# Supplementary material
Source: Springer Nature journal article supplement (https://www.springermedizin.de/resource/supplementary/12936_2010_1332_MOESM2_ESM.pdf/9549540)

**2004**

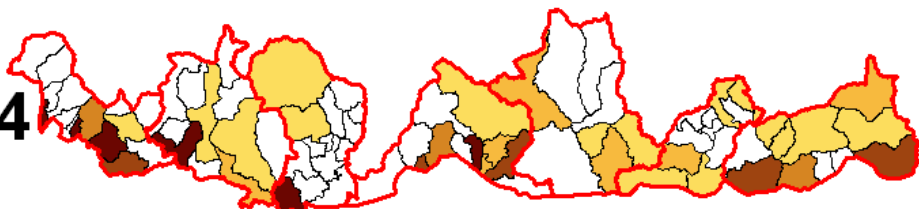

**2005**

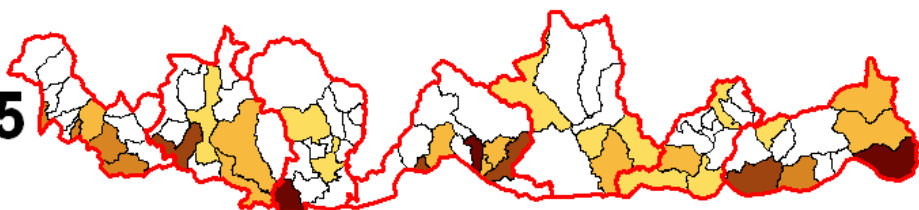

**2006**

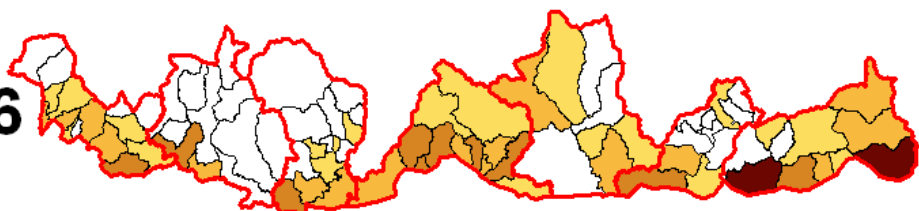

**2007**

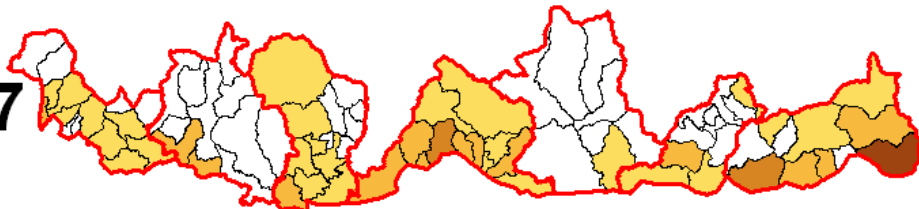

**2008**

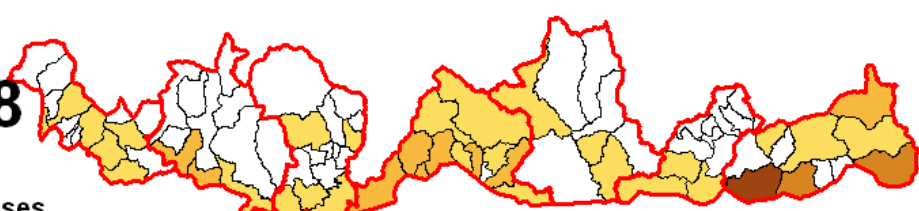

**Legend**  
**Malaria cases**

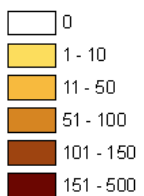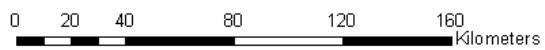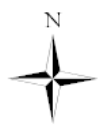

Supplement: MOESM2 [file 9549540]
